# Supplementary material for: Effect of Defoliation on the Defense Reactions of Silver Birch (Betula pendula) Infected with Phytophthora plurivora
Source: MDPI journal article supplement (doi:10.3390/f12070910), 2021-07-13
Supplement: s1 [file s1]

**Table S1.** Height of the seedlings of silver birch.

| Trt | Defoliation | Infected | Mean   | SE   | Q1     | Median | Q3     | IQR   | Min | Max |
|-----|-------------|----------|--------|------|--------|--------|--------|-------|-----|-----|
| 1   | 0           | no       | 119.08 | 3.88 | 113    | 118.5  | 125.25 | 12.25 | 97  | 149 |
| 2   | 0           | yes      | 108.1  | 3.19 | 102.75 | 109    | 117.25 | 14.5  | 77  | 131 |
| 3   | 30          | no       | 103.55 | 4.13 | 89     | 101.5  | 120.25 | 31.25 | 75  | 136 |
| 4   | 30          | yes      | 107.05 | 4.16 | 91.75  | 110    | 120.25 | 28.5  | 76  | 138 |
| 5   | 60          | no       | 104.75 | 3.42 | 95.5   | 110    | 115.25 | 19.75 | 77  | 125 |
| 6   | 60          | yes      | 103.65 | 4.33 | 96.5   | 108    | 116.75 | 20.25 | 54  | 130 |

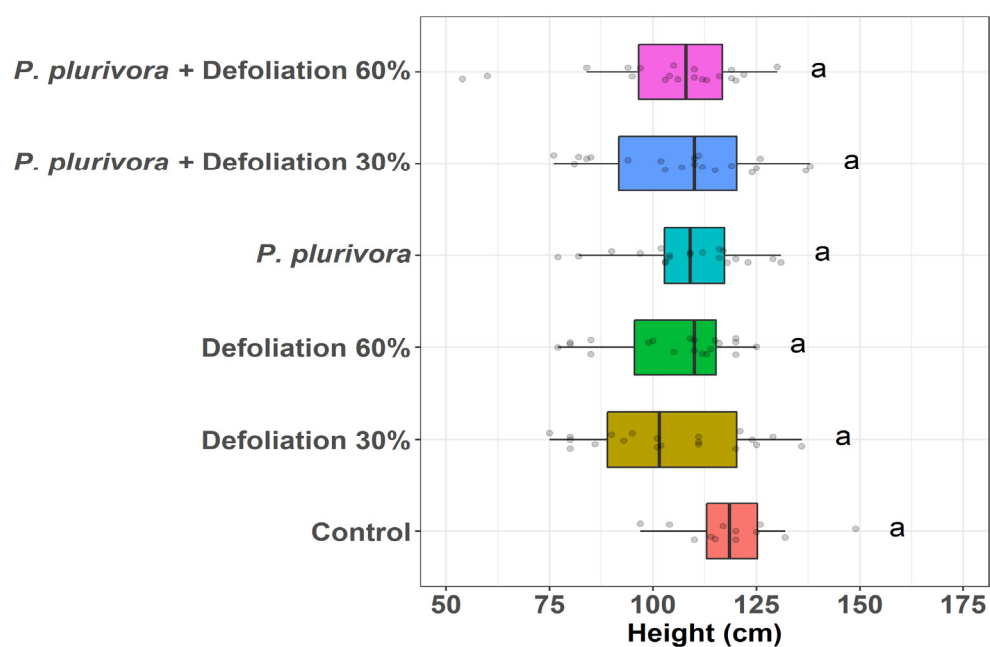

**Figure S1.** Height of the seedlings of silver birch.

**Table S2.** Root collar diameter sample statistics.

|   | Defoliation | Infected | Mean | SE   | Q1   | Median | Q3   | IQR  | Min  | Max  |
|---|-------------|----------|------|------|------|--------|------|------|------|------|
| 1 | 0           | no       | 0.74 | 0.02 | 0.71 | 0.73   | 0.77 | 0.06 | 0.67 | 0.85 |
| 2 | 0           | yes      | 0.64 | 0.02 | 0.58 | 0.65   | 0.67 | 0.09 | 0.45 | 0.78 |
| 3 | 30          | no       | 0.68 | 0.02 | 0.61 | 0.7    | 0.75 | 0.14 | 0.51 | 0.85 |
| 4 | 30          | yes      | 0.63 | 0.03 | 0.57 | 0.62   | 0.69 | 0.12 | 0.36 | 0.97 |
| 5 | 60          | no       | 0.71 | 0.02 | 0.63 | 0.73   | 0.77 | 0.15 | 0.58 | 0.88 |
| 6 | 60          | yes      | 0.65 | 0.02 | 0.6  | 0.63   | 0.71 | 0.1  | 0.52 | 0.79 |

**Table S3.** Stem dry mass sample statistics.

|   | Defoliation | Infected | Mean  | SE   | Q1    | Median | Q3    | IQR  | Min   | Max   |
|---|-------------|----------|-------|------|-------|--------|-------|------|-------|-------|
| 1 | 0           | no       | 16.73 | 1.31 | 15.6  | 17.65  | 19.35 | 3.75 | 8.11  | 23.17 |
| 2 | 0           | yes      | 14.25 | 0.72 | 12.32 | 14.43  | 16.37 | 4.05 | 6.09  | 19.46 |
| 3 | 30          | no       | 13.79 | 0.8  | 11.69 | 14.7   | 15.91 | 4.21 | 6.84  | 19.74 |
| 4 | 30          | yes      | 16.46 | 0.65 | 14.47 | 16.75  | 18.23 | 3.76 | 10.79 | 22.46 |
| 5 | 60          | no       | 12.04 | 0.87 | 9.58  | 13.5   | 14.67 | 5.09 | 2.65  | 17.24 |
| 6 | 60          | yes      | 15.47 | 0.54 | 13.81 | 15.38  | 17.3  | 3.49 | 9.84  | 19.86 |

**Table S4.** Total root length sample statistics.

|   | Defoliation | Infected | Mean   | SE    | Q1     | Median | Q3     | IQR    | Min    | Max    |
|---|-------------|----------|--------|-------|--------|--------|--------|--------|--------|--------|
| 1 | 0           | no       | 400.89 | 46.7  | 307.19 | 433.81 | 518.79 | 211.6  | 101.79 | 601.4  |
| 2 | 0           | yes      | 181.28 | 28.38 | 94.85  | 158.69 | 225.69 | 130.84 | 53.62  | 550.61 |
| 3 | 30          | no       | 411.57 | 33.37 | 310.23 | 425.39 | 484.68 | 174.45 | 153.99 | 663.01 |
| 4 | 30          | yes      | 270.61 | 52.74 | 116.6  | 150.56 | 453.58 | 336.98 | 53.08  | 682.55 |
| 5 | 60          | no       | 308.27 | 49.75 | 164.19 | 284.39 | 489.8  | 325.61 | 41.44  | 595.81 |
| 6 | 60          | yes      | 210    | 49.02 | 59.02  | 119.49 | 243.02 | 184    | 35.28  | 624.35 |

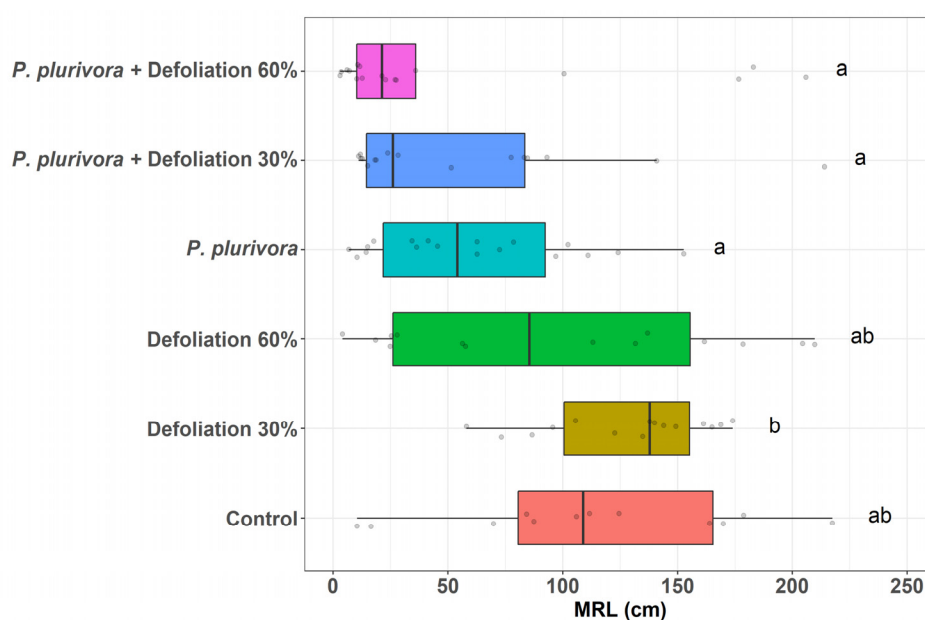

**Figure S2.** Root morphology parameters depending on the treatment: MRL -length of the mother roots 2-5 mm). The lower and upper hinges correspond to the first and third quartiles (the 25th and 75th percentiles) and the center line corresponds to the median. The upper whisker extends from the upper hinge to the largest value no further than  $1.5 \times$  IQR from the hinge (where IQR is the inter-quartile range, or distance between the first and third quartiles). Likewise, the lower whisker extends from the lower hinge to the smallest value no further than  $1.5 \times$  IQR from the hinge.

**Table S5.** Mother roots length sample statistics.

|   | Defoliation | Infected | Mean   | SE    | Q1    | Median | Q3     | IQR    | Min   | Max    |
|---|-------------|----------|--------|-------|-------|--------|--------|--------|-------|--------|
| 1 | 0           | no       | 111.7  | 18.34 | 80.61 | 108.83 | 165.38 | 84.77  | 10.44 | 217.37 |
| 2 | 0           | yes      | 60.3   | 10.22 | 21.82 | 54.07  | 92.39  | 70.57  | 6.8   | 152.72 |
| 3 | 30          | no       | 127.78 | 9.37  | 100.6 | 137.85 | 155.27 | 54.68  | 58.07 | 173.97 |
| 4 | 30          | yes      | 56.05  | 14.38 | 14.52 | 26.03  | 83.53  | 69.01  | 11.09 | 213.93 |
| 5 | 60          | no       | 96.49  | 19.78 | 26.03 | 85.41  | 155.51 | 129.48 | 4.11  | 209.77 |
| 6 | 60          | yes      | 50.91  | 16.88 | 10.27 | 21.22  | 35.9   | 25.63  | 3.04  | 205.95 |

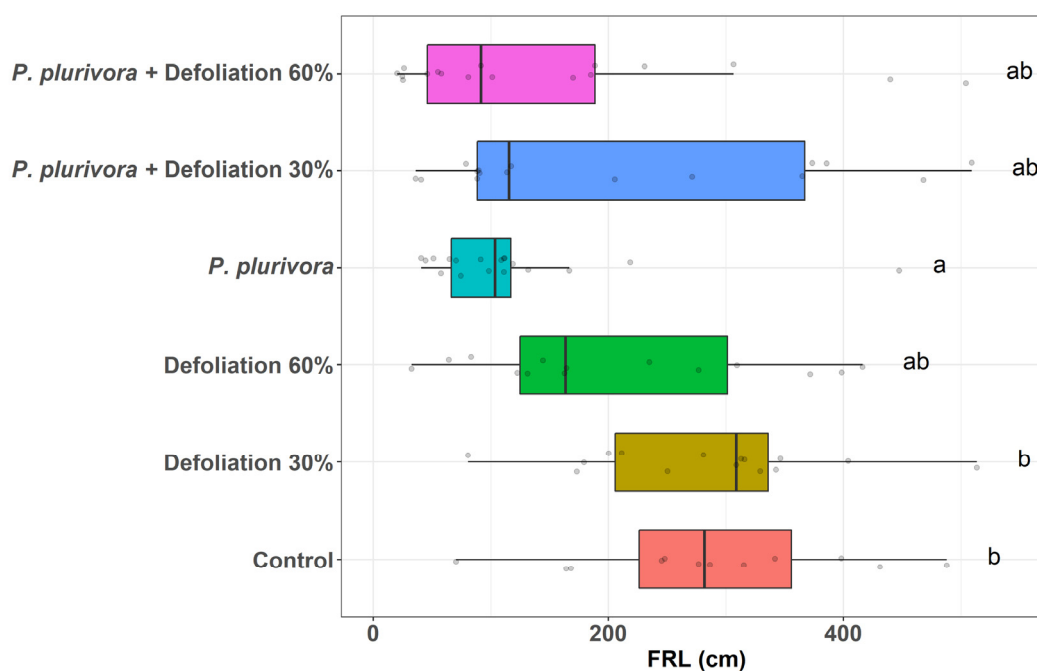

**Figure S3.** Root morphology parameters depending on the treatment: FRL - length of fine roots (0-2 mm). The lower and upper hinges correspond to the first and third quartiles (the 25th and 75th percentiles) and the center line corresponds to the median. The upper whisker extends from the upper hinge to the largest value no further than  $1.5 \times$  IQR from the hinge (where IQR is the inter-quartile range, or distance between the first and third quartiles). Likewise, the lower whisker extends from the lower hinge to the smallest value no further than  $1.5 \times$  IQR from the hinge.

**Table S6.** Fine roots length sample statistics.

|   | Defoliation | Infected | Mean   | SE    | Q1     | Median | Q3     | IQR    | Min   | Max    |
|---|-------------|----------|--------|-------|--------|--------|--------|--------|-------|--------|
| 1 | 0           | no       | 286.18 | 34.46 | 226.15 | 281.64 | 355.87 | 129.72 | 70.47 | 487.95 |
| 2 | 0           | yes      | 117.76 | 22.07 | 66.26  | 103.47 | 117    | 50.73  | 40.63 | 447.57 |
| 3 | 30          | no       | 283.3  | 27.35 | 205.72 | 308.97 | 336.01 | 130.29 | 80.61 | 513.48 |
| 4 | 30          | yes      | 207.62 | 40.52 | 88.54  | 115.51 | 367.08 | 278.54 | 35.94 | 509.25 |
| 5 | 60          | no       | 208.03 | 34.02 | 124.72 | 163.51 | 301.3  | 176.57 | 32.48 | 416.3  |
| 6 | 60          | yes      | 150.24 | 35.68 | 46.01  | 91.7   | 188.62 | 142.61 | 20.31 | 504.32 |

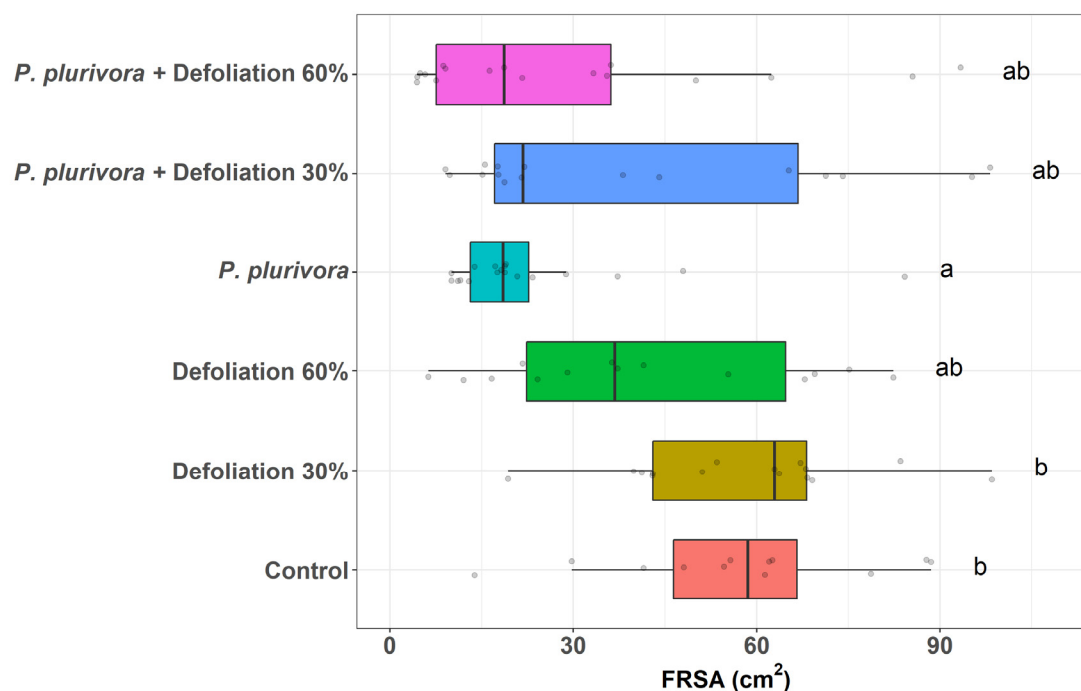

**Figure S4.** Root morphology parameters depending on the treatment: FRSA - fine root area. The lower and upper hinges correspond to the first and third quartiles (the 25th and 75th percentiles) and the center line corresponds to the median. The upper whisker extends from the upper hinge to the largest value no further than  $1.5 \times \text{IQR}$  from the hinge (where IQR is the inter-quartile range, or distance between the first and third quartiles). Likewise, the lower whisker extends from the lower hinge to the smallest value no further than  $1.5 \times \text{IQR}$  from the hinge.

**Table S7.** Fine root area sample statistics.

|   | Defoliation | Infected | Mean  | SE   | Q1    | Median | Q3    | IQR   | Min   | Max   |
|---|-------------|----------|-------|------|-------|--------|-------|-------|-------|-------|
| 1 | 0           | no       | 57.04 | 6.41 | 46.42 | 58.54  | 66.62 | 20.2  | 13.82 | 88.53 |
| 2 | 0           | yes      | 23.41 | 4.26 | 13.12 | 18.51  | 22.7  | 9.58  | 10.03 | 84.25 |
| 3 | 30          | no       | 58.15 | 5.07 | 42.99 | 62.91  | 68.19 | 25.2  | 19.31 | 98.5  |
| 4 | 30          | yes      | 39.59 | 7.76 | 17.1  | 21.78  | 66.76 | 49.66 | 9.06  | 98.24 |
| 5 | 60          | no       | 41.09 | 6.67 | 22.33 | 36.79  | 64.75 | 42.42 | 6.27  | 82.41 |
| 6 | 60          | yes      | 29.28 | 6.9  | 7.53  | 18.65  | 36.13 | 28.6  | 4.41  | 93.4  |

**Table S8.** Root dry mass sample statistics.

|   | Defoliation | Infected | Mean  | SE   | Q1    | Median | Q3    | IQR  | Min  | Max   |
|---|-------------|----------|-------|------|-------|--------|-------|------|------|-------|
| 1 | 0           | no       | 11.34 | 0.48 | 10.07 | 11.32  | 12.84 | 2.77 | 9.26 | 14.25 |
| 2 | 0           | yes      | 8.09  | 0.41 | 7.06  | 8.05   | 9.61  | 2.55 | 5.46 | 11.17 |
| 3 | 30          | no       | 10.05 | 0.55 | 9.07  | 10.09  | 11.64 | 2.57 | 4.27 | 14.42 |
| 4 | 30          | yes      | 9.11  | 0.53 | 8.29  | 9.81   | 10.38 | 2.1  | 3.42 | 13.02 |
| 5 | 60          | no       | 8.43  | 0.52 | 7.22  | 9.05   | 10.25 | 3.04 | 3.01 | 11.21 |
| 6 | 60          | yes      | 8.18  | 0.44 | 6.48  | 8.34   | 9.85  | 3.37 | 4.21 | 10.63 |

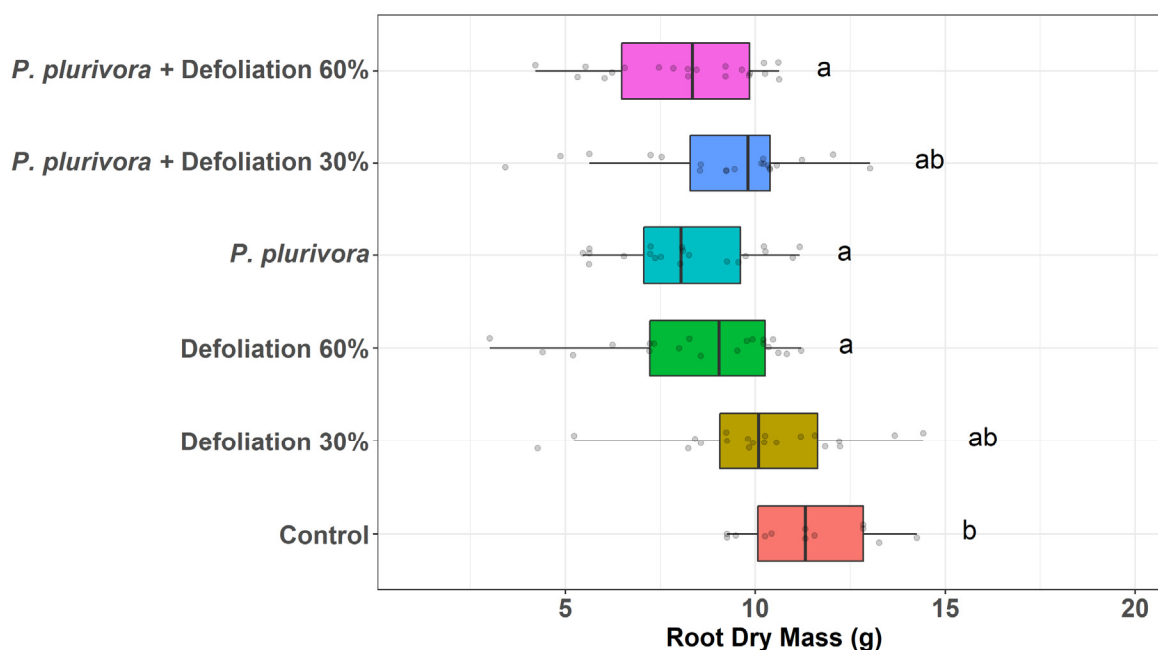

**Figure S5.** Root dry mass. The lower and upper hinges correspond to the first and third quartiles (the 25th and 75th percentiles) and the center line corresponds to the median. The upper whisker extends from the upper hinge to the largest value no further than  $1.5 \times \text{IQR}$  from the hinge (where IQR is the inter-quartile range, or distance between the first and third quartiles). Likewise, the lower whisker extends from the lower hinge to the smallest value no further than  $1.5 \times \text{IQR}$  from the hinge.

**Table S9.** Measurement values for parameters of chlorophyll fluorescence in May.

|      | Control                      | Defoliation 30%              | Defoliation 60%               | <i>P. plurivora</i>          | <i>P. plurivora</i> + Defoliation 30% | <i>P. plurivora</i> + Defoliation 60% |
|------|------------------------------|------------------------------|-------------------------------|------------------------------|---------------------------------------|---------------------------------------|
| Tfm  | 420.65ab<br>(366.39, 482.93) | 339.69a<br>(315.04, 366.26)  | 494.17b<br>(389.29, 627.30)   | 347.63ab<br>(324.75, 372.13) | 365.84ab<br>(340.86, 392.66)          | 357.14ab<br>(314.03, 406.18)          |
| Area | 23368 a<br>(20507, 26628)    | 23499a (21592, 25574)        | 22616ab<br>(18423, 7764)      | 27981bc<br>(26079, 30022)    | 28760bc<br>(26573, 31127)             | 36813c<br>(28527, 47506)              |
| F0   | 306.52ab<br>(292.03, 321.72) | 345.66c<br>(329.13, 363.02)  | 324.17abc<br>(294.91, 356.33) | 298.26a(288.92, 307.91)      | 333.10bc<br>(316.23, 350.88)          | 314.67abc<br>(299.76, 330.31)         |
| Fm   | 1152.9a<br>(1109.3, 1198.2)  | 1257.8b<br>(1221.0, 1295.9)  | 1160.1ab<br>(1104.7, 1218.2)  | 1231.7ab<br>(1195.6, 1268.9) | 1238.2ab<br>(1191.6, 1286.7)          | 1254.4b<br>(1218.8, 1291.1)           |
| Fv   | 46.35a<br>(804.69, 890.17)   | 912.19ab<br>(875.92, 949.95) | 835.92ab<br>(774.13, 902.64)  | 933.39b (898.17, 970.00)     | 905.14ab<br>(867.15, 944.80)          | 939.76b<br>(904.74, 976.14)           |

|          |                                 |                                |                               |                              |                             |                                 |
|----------|---------------------------------|--------------------------------|-------------------------------|------------------------------|-----------------------------|---------------------------------|
| Fv/Fm    | 0.73223ab<br>(0.71769, 0.74706) | 0.79528c<br>(0.77353, 0.81764) | 0.71900ab (0.68784, 0.75157)  | 0.75629b(0.74609, 0.76662)   | 0.73014a (0.71865, 0.74182) | 0.74788ab (0.73498, 0.76101)    |
| ABS/RC   | 2.0931b<br>(1.9778, 2.215)      | 2.0960ab<br>(1.9976, 2.1992)   | 2.0816ab<br>(1.8895, 2.2934)  | 1.8996a (1.8442, 1.9566)     | 2.0476b (1.9675, 2.1309)    | 2.0153ab<br>(1.9185, 2.1169)    |
| Dlo/RC   | 0.57437b<br>(0.51518, 0.64036)  | 0.58691b<br>(0.53577, 0.64294) | 0.60477ab (0.49466, 0.73941)  | 0.46707a (0.43814, 0.49790)  | 0.56987b (0.52689, 0.61636) | 0.51935ab (0.47280, 0.57049)    |
| Tro/RC   | 1.5187a<br>(1.4639, 1.5755)     | 1.5091a<br>(1.4551, 1.5650)    | 1.4769a<br>(1.3995, 1.5585)   | 1.4325a<br>(1.4019, 1.4638)  | 1.4777a (1.4399, 1.5165)    | 1.4959a<br>(1.4422, 1.5517)     |
| Eto/RC   | 0.94324c<br>(0.91148, 0.97609)  | 0.68740a<br>(0.60925, 0.77557) | 0.80013abc (0.70661, 0.90604) | 0.88537bc (0.84081, 0.93230) | 0.75605a (0.70287, 0.81326) | 0.75514ab<br>(0.68476, 0.83276) |
| PI total | 1.8616ab<br>(1.42611, 2.4300)   | 1.2213a<br>(0.99764, 1.4952)   | 1.5629ab (0.94732, 2.5786)    | 2.1975b<br>(1.88402, 2.5631) | 2.4485b (2.02755, 2.9570)   | 1.8798b<br>(1.54959, 2.2804)    |

\*Mean (upper CL, lower CL). Values marked with the same letter do not different significantly. The numbers in parentheses are the upper and lower 95% confidence limits on the mean above

**Table S10.** Measurement values for parameters of chlorophyll fluorescence in September.

|          | Control                         | Defoliation 30%                | Defoliation 60%                 | <i>P. plurivora</i>            | <i>P. plurivora</i> +<br>Defoliation 30% | <i>P. plurivora</i> +<br>Defoliation 60% |
|----------|---------------------------------|--------------------------------|---------------------------------|--------------------------------|------------------------------------------|------------------------------------------|
| Tfm      | 645.0 b<br>(547.9, 759.3)       | 477.5 a<br>(423.1, 538.9)      | 465.0a<br>(415.9, 519.9)        | 616.7 b<br>(583.3, 651.9)      | 615.8 b<br>(594.1, 638.3)                | 652.4 b<br>(624.1, 682.0)                |
| Area     | 27623a<br>(23667, 32239)        | 34656ab (30361, 39559)         | 31446a<br>(28691, 34465)        | 43740 cd<br>(40292, 47483)     | 46270 d (43164, 49599)                   | 39776 bc (36948, 42821)                  |
| F0       | 301.95c<br>(285.33, 319.54)     | 277.70bc<br>(265.40, 290.57)   | 273.32abc<br>(260.82, 286.42)   | 263.00ab<br>(256.11, 270.08)   | 253.47a (245.23, 262.00)                 | 259.29ab (252.02, 266.76)                |
| Fm       | 1401.4a<br>(1332.8, 1473.6)     | 1449.5a (1414.4, 1485.6)       | 1434.7a<br>(1387.5, 1483.6)     | 1539.7b<br>(1502.6, 1577.7)    | 1554.6b (1508.3, 1602.3)                 | 1512.9ab<br>(11485.9, 1540.4)            |
| Fv       | 1099.5 a<br>(1035.4, 1167.4)    | 1171.9a (1138.8, 1205.8)       | 1161.4a<br>(1110.8, 1214.3)     | 1276.7b<br>(1242.3, 1312.0)    | 1301.2b (1262.1, 1341.4)                 | 1253.6b (1231.0, 1276.6)                 |
| Fv/Fm    | 0.78305a<br>(0.76982, 0.79650)  | 0.80820b<br>(0.79973, 0.81676) | 0.80805ab<br>(0.79526, 0.82104) | 0.82894c<br>(0.82448, 0.83344) | 0.83689d<br>(0.83447, 0.83932)           | 0.82862c<br>(0.82503, 0.83223)           |
| ABS/RC   | 1.6783b<br>(1.6134, 1.7457)     | 1.6970b (1.5380, 1.8724)       | 1.6719b<br>(1.5375, 1.8180)     | 1.2829a<br>(1.2042, 1.3667)    | 1.2005a (1.1590, 1.2434)                 | 1.2429a (1.1512, 1.3419)                 |
| Dlo/RC   | 0.36716b<br>(0.33540, 0.40193)  | 0.33078b<br>(0.28953, 0.37791) | 0.32807b<br>(0.28646, 0.37573)  | 0.22072a<br>(0.20272, 0.24032) | 0.19599a<br>(0.18748, 0.20490)           | 0.21449a<br>(0.19515, 0.23574)           |
| Eto/RC   | 0.71784ab<br>(0.63990, 0.80527) | 0.75062b<br>(0.72150, 0.78093) | 0.76410b<br>(0.70685, 0.82599)  | 0.64445a<br>(0.62647, 0.66295) | 0.61369a<br>(0.59763, 0.63019)           | 0.61428a<br>(0.58980, 0.63976)           |
| PI total | 1.4902a<br>(1.0944, 2.0290)     | 2.7063abc<br>(1.9208, 3.8129)  | 2.2986ab<br>(1.7914, 2.9495)    | 3.9284c<br>(3.1939, 4.8318)    | 4.3128c (3.5707, 5.2093)                 | 3.7718bc (2.9474, 4.8268)                |

\*Mean (upper CL, lower CL). Values marked with the same letter do not different significantly. The numbers in parentheses are the upper and lower 95% confidence limits on the mean above

**Table S11.** Sample statistic of the degree of leaf damage according to the Khvasko.

|   | Defoliation | Infected | Mean | SE   | Q1   | Median | Q3 | IQR  | Min | Max |
|---|-------------|----------|------|------|------|--------|----|------|-----|-----|
| 1 | 0           | no       | 0.8  | 0.42 | 0    | 0      | 1  | 1    | 0   | 4   |
| 2 | 0           | yes      | 2.72 | 0.28 | 2.25 | 3      | 3  | 0.75 | 0   | 4   |
| 3 | 30          | no       | 1    | 0.36 | 0    | 0.5    | 1  | 1    | 0   | 4   |
| 4 | 30          | yes      | 2.6  | 0.26 | 2    | 3      | 3  | 1    | 0   | 4   |
| 5 | 60          | no       | 1.13 | 0.2  | 0.75 | 1      | 2  | 1.25 | 0   | 2   |
| 6 | 60          | yes      | 3.1  | 0.25 | 2.75 | 3.5    | 4  | 1.25 | 1   | 4   |

**Table S12.** Detailed chemical composition of extracts from birch seedling.

| Compound                                                   | Control          |              | Defoliation 30%   |              | Defoliation 60%  |              | <i>P. plurivora</i> |              | <i>P. plurivora</i> +<br>defoliation 30% |              | <i>P. plurivora</i> +<br>defoliation 60% |              |
|------------------------------------------------------------|------------------|--------------|-------------------|--------------|------------------|--------------|---------------------|--------------|------------------------------------------|--------------|------------------------------------------|--------------|
|                                                            | Area of<br>peak  | TIC<br>(%)   | Area of<br>peak   | TIC<br>(%)   | Area of<br>peak  | TIC<br>(%)   | Area of<br>peak     | TIC<br>(%)   | Area of<br>peak                          | TIC<br>(%)   | Area of<br>peak                          | TIC<br>(%)   |
| <b>Flavonoids, including:</b>                              | <b>9134261</b>   | <b>0.48</b>  | <b>18743433</b>   | <b>0.75</b>  | -                | -            | <b>14322302</b>     | <b>0.54</b>  | <b>10271268</b>                          | <b>0.42</b>  | <b>139411250</b>                         | <b>4.78</b>  |
| Catechine, penta-TMS                                       | 9134261          | 0.48         | 3813810           | 0.15         | -                | -            | -                   | -            | -                                        | -            | 14021330                                 | 0.48         |
| Kempheride, di-TMS                                         | -                | -            | 14929623          | 0.60         | -                | trace**      | 14322302            | 0.54         | 10271268                                 | 0.42         | 53370137                                 | 1.83         |
| 3-Methylfluteolin, tri-TMS                                 | -                | -            | -                 | -            | -                | -            | -                   | -            | -                                        | -            | 8102471                                  | 0.28         |
| Flavonoid, di-TMS                                          | -                | -            | -                 | -            | -                | -            | -                   | -            | -                                        | -            | 10397189                                 | 0.36         |
| 3,7-Dimethyl quercetin, tri-TMS                            | -                | -            | -                 | -            | -                | -            | -                   | -            | -                                        | -            | 12134818                                 | 0.42         |
| Santin, di-TMS                                             | -                | -            | -                 | -            | -                | -            | -                   | -            | -                                        | -            | 18830469                                 | 0.64         |
| Cirsimaritin, di-TMS                                       | -                | -            | -                 | -            | -                | -            | -                   | -            | -                                        | -            | 22554837                                 | 0.77         |
| <b>Other phenols, including:</b>                           | <b>58704663</b>  | <b>3.08</b>  | <b>104921964</b>  | <b>4.22</b>  | <b>31885974</b>  | <b>1.57</b>  | <b>159445716</b>    | <b>5.98</b>  | <b>86970603</b>                          | <b>3.54</b>  | <b>8753694</b>                           | <b>0.30</b>  |
| Eugenol, TMS                                               | -                | -            | 4165266           | 0.17         | -                | -            | 5135214             | 0.19         | -                                        | -            | -                                        | -            |
| Tyrosol, di-TMS                                            | 7336377          | 0.38         | 14705370          | 0.59         | -                | trace        | 28113250            | 1.05         | 15403733                                 | 0.63         | -                                        | -            |
| 3-Hydroxybenzoic acid, di-TMS                              | -                | -            | -                 | -            | 4323365          | 0.21         | -                   | -            | -                                        | -            | -                                        | -            |
| Betuligenol, di-TMS                                        | 30738349         | 1.61         | 60004411          | 2.41         | 4180671          | 0.21         | 87792261            | 3.29         | 62363278                                 | 2.54         | 8753694                                  | 0.30         |
| Protocatechuic acid, tri-TMS                               | -                | -            | -                 | -            | 11912406         | 0.58         | 7437009             | 0.28         | -                                        | -            | -                                        | -            |
| 2-(4-Hydroxyphenyl)propionate, di-TMS                      | 10389760         | 0.54         | 6242506           | 0.25         | -                | trace        | 18920110            | 0.71         | 4580165                                  | 0.19         | -                                        | -            |
| Rhododendrin, penta-TMS                                    | -                | -            | 6364303           | 0.26         | -                | -            | -                   | -            | -                                        | -            | -                                        | -            |
| 1-Docosyl p-coumarate, TMS                                 | 10240177         | 0.54         | 13440108          | 0.54         | 11469532         | 0.56         | 12047872            | 0.45         | 4623427                                  | 0.19         | -                                        | trace        |
| <b>Triterpenes, including:</b>                             | <b>951593465</b> | <b>49.88</b> | <b>1199222885</b> | <b>48.20</b> | <b>368381931</b> | <b>18.08</b> | <b>1173606558</b>   | <b>44.04</b> | <b>1255047108</b>                        | <b>51.11</b> | <b>1894876897</b>                        | <b>64.90</b> |
| Squalene                                                   | -                | -            | 5695481           | 0.23         | -                | -            | -                   | -            | -                                        | -            | 6576519                                  | 0.23         |
| Triterpenoide C30H48O2, TMS                                | 6894451          | 0.36         | 15255600          | 0.61         | -                | trace        | 11563422            | 0.43         | 14064248                                 | 0.57         | 31081329                                 | 1.06         |
| 3,4-seco-Dammara-4(29),20(21),24(25)-trien-3-oic acid, TMS | 515590976        | 27.03        | 808651895         | 32.50        | 149652371        | 7.35         | 781034971           | 29.31        | 793500748                                | 32.31        | 988548239                                | 33.86        |
| Dammaradien-3-one                                          | 31852698         | 1.67         | 67246401          | 2.70         | 12159382         | 0.60         | 55840910            | 2.10         | 53614810                                 | 2.18         | 117063704                                | 4.01         |
| Triterpenoid C30H50O, TMS                                  | 8049931          | 0.42         | 17922851          | 0.72         | -                | trace        | 6056861             | 0.23         | 7589746                                  | 0.31         | 19038492                                 | 0.65         |



|                                                                       |                  |              |                  |              |                  |              |                  |              |                  |              |                  |              |
|-----------------------------------------------------------------------|------------------|--------------|------------------|--------------|------------------|--------------|------------------|--------------|------------------|--------------|------------------|--------------|
| 3,4- <i>seco</i> -Olean-4(24)-en-19-on-3-oic acid, TMS                | 12065892         | 0.63         | 10975938         | 0.44         | 9079157          | 0.45         | 6827182          | 0.26         | 11524323         | 0.47         | 10261838         | 0.35         |
| 3,4- <i>seco</i> -Urs-4(23),20(30)-dien-3-oic acid, TMS               | 54641206         | 2.86         | 53805192         | 2.16         | 8752468          | 0.43         | 47365947         | 1.78         | 64755728         | 2.64         | 101882027        | 3.49         |
| Triterpenoide C30H48O2, TMS                                           | -                | -            | -                | -            | -                | -            | 13658041         | 0.51         | 24521560         | 1.00         | 62496663         | 2.14         |
| 20-Hydroxy-3,4- <i>seco</i> -dammara-4(28),24-dien-3-oic acid, di-TMS | 43185171         | 2.26         | 21367346         | 0.86         | 44261040         | 2.17         | 20963730         | 0.79         | 29620406         | 1.21         | 59920992         | 2.05         |
| Triterpenoid C30H48O3, di-TMS                                         | 33752317         | 1.77         | 43984718         | 1.77         | 10260531         | 0.50         | 26295713         | 0.99         | 39166174         | 1.59         | 84649947         | 2.90         |
| Dipterocarpol, TMS, isomer 20R                                        | 18474325         | 0.97         | 13955661         | 0.56         | -                | trace        | 19174617         | 0.72         | 17484861         | 0.71         | 29213800         | 1.00         |
| 3,4- <i>seco</i> -Urs-4(23),20(30)-dien-19-ol-3-oic acid, di-TMS      | -                | -            | -                | -            | -                | -            | -                | -            | 6751244          | 0.27         | 17525192         | 0.60         |
| Dipterocarpol, TMS, isomer 20S                                        | 47600643         | 2.50         | 16362068         | 0.66         | 7265989          | 0.36         | 25550279         | 0.96         | 33134665         | 1.35         | 39865802         | 1.37         |
| Triterpenoid C30H48O3, di-TMS                                         | -                | -            | -                | -            | -                | -            | -                | -            | -                | -            | 21033032         | 0.72         |
| Triterpenoide, TMS                                                    | -                | -            | -                | -            | -                | -            | -                | -            | 15937828         | 0.65         | 22552578         | 0.77         |
| Triterpenoid, TMS                                                     | 22966976         | 1.20         | 18711232         | 0.75         | 9813017          | 0.48         | 8028160          | 0.30         | 10740352         | 0.44         | 75479708         | 2.59         |
| Betulin, di-TMS                                                       | 10162702         | 0.53         | 6108021          | 0.25         | 16446404         | 0.81         | 7288105          | 0.27         | 9038699          | 0.37         | 34341764         | 1.18         |
| Oleanolic acid, di-TMS                                                | 11618619         | 0.61         | 5524983          | 0.22         | 10036120         | 0.49         | 11554035         | 0.43         | 5045629          | 0.21         | 9911921          | 0.34         |
| Betulinic acid, di-TMS                                                | 15120499         | 0.79         | 8619403          | 0.35         | 14844995         | 0.73         | 14217471         | 0.53         | 8445657          | 0.34         | 20505188         | 0.70         |
| Kabraleon, TMS                                                        | 12769730         | 0.67         | 8201085          | 0.33         | 8288367          | 0.41         | 9531390          | 0.36         | 12108610         | 0.49         | 34523019         | 1.18         |
| Methyl acetylbetulinate                                               | 8528922          | 0.45         | 7940434          | 0.32         | 38302628         | 1.88         | 10935061         | 0.41         | 9666533          | 0.39         | 13984116         | 0.48         |
| Triterpenoid, TMS                                                     | 25831853         | 1.35         | 11975223         | 0.48         | -                | trace        | 17547145         | 0.66         | 11235880         | 0.46         | 24060812         | 0.82         |
| Triterpenoid, TMS                                                     | 43797660         | 2.30         | 35379493         | 1.42         | 17627469         | 0.87         | 59873119         | 2.25         | 60373724         | 2.46         | 58469824         | 2.00         |
| Triterpenoid, TMS                                                     | 28688894         | 1.50         | 21539862         | 0.87         | 11591993         | 0.57         | 20300399         | 0.76         | 16725683         | 0.68         | 11890391         | 0.41         |
| <b>Sterols, including:</b>                                            | <b>99105427</b>  | <b>5.19</b>  | <b>124923232</b> | <b>5.02</b>  | <b>251610495</b> | <b>12.35</b> | <b>104666220</b> | <b>3.93</b>  | <b>95493917</b>  | <b>3.89</b>  | <b>166132127</b> | <b>5.69</b>  |
| Campesterol, TMS                                                      | -                | -            | -                | -            | 15241371         | 0.75         | 6580917          | 0.25         | 6099381          | 0.25         | 17154668         | 0.59         |
| β-Sitosterol, TMS                                                     | 91548212         | 4.80         | 113989773        | 4.58         | 199608362        | 9.80         | 91106763         | 3.42         | 82643675         | 3.37         | 138443568        | 4.74         |
| Stigmastanol, TMS                                                     | 7557215          | 0.40         | 10933458         | 0.44         | 36760762         | 1.80         | 6978540          | 0.26         | 6750861          | 0.27         | 10533891         | 0.36         |
| <b>Fatty acids &amp; fatty acids esters, including:</b>               | <b>369382967</b> | <b>19.36</b> | <b>521102567</b> | <b>20.94</b> | <b>809440027</b> | <b>39.73</b> | <b>584116495</b> | <b>21.92</b> | <b>488385335</b> | <b>19.89</b> | <b>402699428</b> | <b>13.79</b> |
| Hexanoic acid, TMS                                                    | 8171174          | 0.43         | 16209604         | 0.65         | 16995447         | 0.83         | 34898114         | 1.31         | 24531674         | 1.00         | -                | -            |
| Heptanoic acid, TMS                                                   | 8145411          | 0.43         | 4972568          | 0.20         | 20275212         | 1.00         | 5624030          | 0.21         | -                | -            | -                | -            |
| Tetradecanoic acid, TMS                                               | 10624526         | 0.56         | 8346978          | 0.34         | 7657049          | 0.38         | 7203809          | 0.27         | 11306281         | 0.46         | -                | -            |
| Palmitic acid, TMS                                                    | 143956021        | 7.55         | 157984334        | 6.35         | 165955624        | 8.15         | 165884891        | 6.22         | 136268652        | 5.55         | 57560918         | 1.97         |
| Linoleic acid, TMS                                                    | 44982122         | 2.36         | 82765734         | 3.33         | 185446281        | 9.10         | 73206553         | 2.75         | 95446902         | 3.89         | 66534823         | 2.28         |
| Oleic acid, TMS                                                       | 97908942         | 5.13         | 147659480        | 5.93         | 208847053        | 10.25        | 143260355        | 5.38         | 141415397        | 5.76         | 122506890        | 4.20         |
| Elaidic acid, TMS                                                     | 13471339         | 0.71         | 18519441         | 0.74         | 28299097         | 1.39         | 12516576         | 0.47         | 22641767         | 0.92         | 8675297          | 0.30         |
| Stearic acid, TMS                                                     | 14593461         | 0.76         | 20044204         | 0.81         | 48011456         | 2.36         | 22532070         | 0.85         | 14553597         | 0.59         | 10978694         | 0.38         |
| Eicosyl acetate                                                       | -                | -            | -                | -            | -                | -            | 4707164          | 0.18         | -                | trace        | 4056780          | 0.14         |
| Eicosanoic acid, TMS                                                  | 8202175          | 0.43         | 13899563         | 0.56         | 42687534         | 2.10         | 16361636         | 0.61         | 9825577          | 0.40         | 11009305         | 0.38         |

trace\*\*, < 0,1 %TIC; (1), Defoliation 30% (2), Defoliation 60% (3), *P. plurivora* (4), *P. plurivora* + defoliation 30% (5), *P. plurivora* + defoliation 60% (6).
